# Supplementary material for: High-yield synthesis of millimetre-long, semiconducting carbon nitride nanotubes with intense photoluminescence emission and reproducible photoconductivity
Source: Royal Society of Chemistry journal article supplement (doi:10.1039/c2nr30777d), 2012-01-01
Supplement: c2nr30777d.pdf [file c2nr30777d.pdf]

**Electronic Supplementary Information**

**High-Yield Synthesis of Millimeter-Long, Semiconducting Carbon Nitride Nanotubes with Intense Photoluminescence Emission and Reproducible Photoconductivity**

**Jun Gao,<sup>b,c</sup> Yong Zhou<sup>a,b,c,\*</sup>, Zhaosheng Li,<sup>a,b,d</sup> Shicheng Yan,<sup>a,b,d</sup> Nanyan Wang,<sup>b,c</sup> and Zhigang Zou<sup>a,b, c,d,\*</sup>**

<sup>a</sup> *National Laboratory of Solid State Microstructures, Nanjing University, Nanjing 210093, P. R. China. E-mail: [zhouyong1999@nju.edu.cn](mailto:zhouyong1999@nju.edu.cn) (Y.Zhou), [zgzou@nju.edu.cn](mailto:zgzou@nju.edu.cn) (Z.G.Zou)*

<sup>b</sup> *Eco-Materials and Renewable Energy Research Center (ERERC), Nanjing University, Nanjing 210093, P. R. China.*

<sup>c</sup> *School of Physics, Nanjing University, Nanjing 210093, P. R. China.*

<sup>d</sup> *Department of Materials Science and Engineering, Nanjing University, Nanjing 210093, P. R. China.*

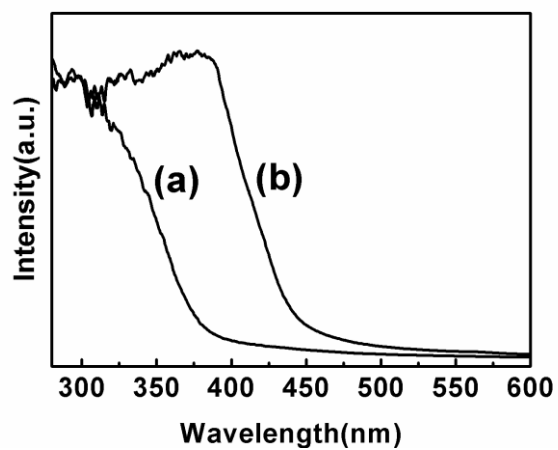

**Figure S1** Ultraviolet visible spectra of (a) the tubular carbon nitride and (b) the bulky g-C<sub>3</sub>N<sub>4</sub> synthesized by directly heating melamine at 520 °C for 2 h.

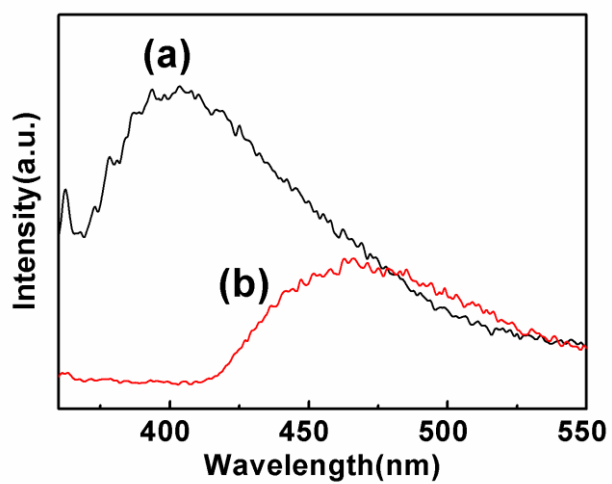

**Figure S2** Photoluminescent (PL) spectra of (a) the tubular carbon nitride and (b) the bulky g-C<sub>3</sub>N<sub>4</sub> synthesized by directly heating melamine at 520 °C for 2 h.

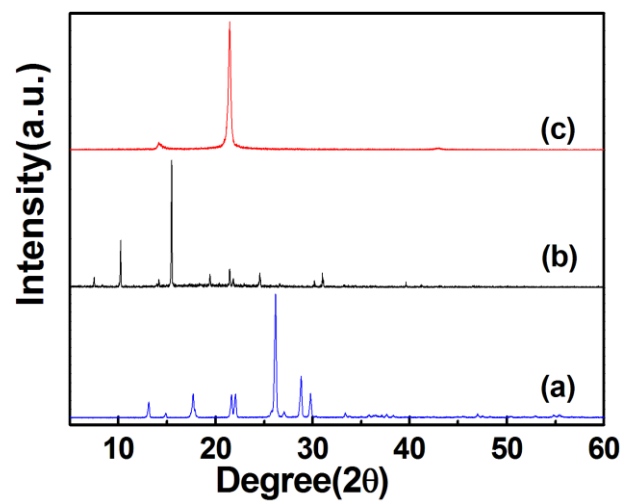

**Figure S3** XRD patterns of (a) melamine, (b) the nanofiber, and (c) carbon nitride nanotube.

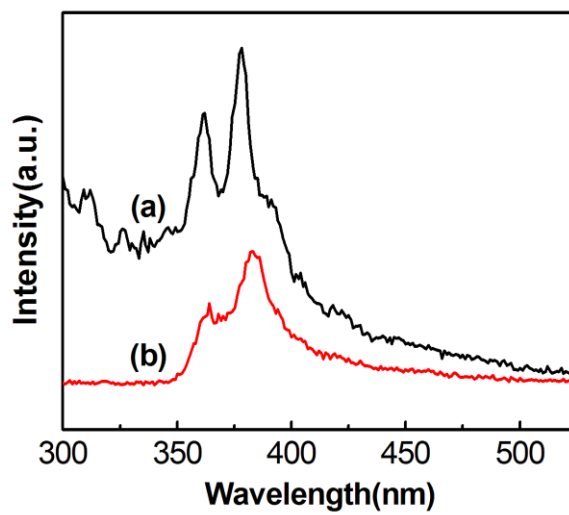

**Figure S4** Photoluminescent (PL) spectra of (a) pure melamine and (b) the nanofiber.

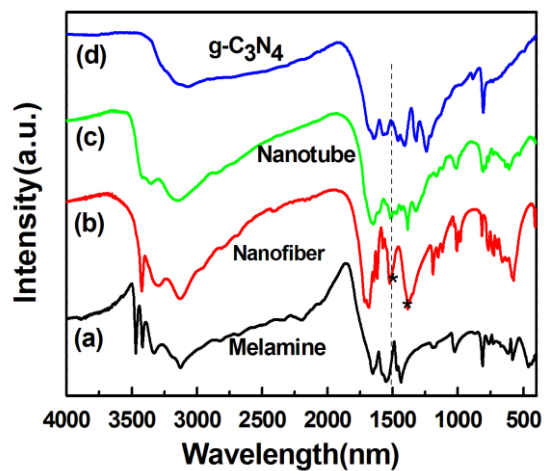

**Figure S5** FTIR adsorption spectra of (a) melamine, (b) the nanofibrous precipitation, (c) the tubular carbon nitride, and (d) the bulky g-C<sub>3</sub>N<sub>4</sub> synthesized by directly heating melamine at 520 °C for 2 h.

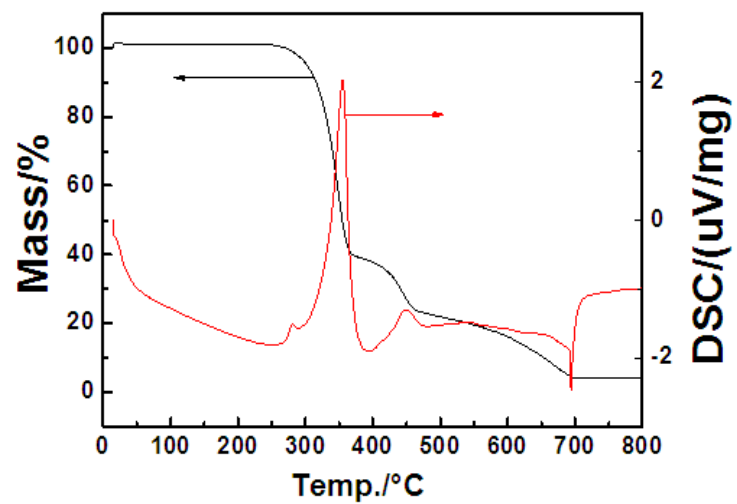

**Figure S6** TG-DSC measurement of the nanofiber in air.
